# Supplementary material for: Lathyrus aureus and Lathyrus pratensis: characterization of phytochemical profiles by liquid chromatography-mass spectrometry, and evaluation of their enzyme inhibitory and antioxidant activities
Source: Royal Society of Chemistry journal article supplement (doi:10.1039/c6ra17170b), 2016-01-01
Supplement: c6ra17170b1.pdf [file c6ra17170b1.pdf]

***Lathyrus aureus* and *Lathyrus pratensis*: characterization of phytochemical profiles  
by liquid chromatography-mass spectrometry, and evaluation of their enzyme  
inhibitory and antioxidant activities**

E. J. Llorent-Martínez<sup>1</sup>, P. Ortega-Barrales<sup>2</sup>, G. Zengin<sup>3\*</sup>, S. Uysal<sup>3</sup>, R. Ceylan<sup>3</sup>,  
G.O.Guler<sup>4</sup>, A.Mocan<sup>5</sup>, A. Aktumsek<sup>3</sup>

<sup>1</sup> University of Castilla-La Mancha, Regional Institute for Applied Chemistry Research (IRICA), Ciudad Real 13071, Spain

<sup>2</sup> Department of Physical and Analytical Chemistry, University of Jaén, Campus Las Lagunillas S/N, E-23071 Jaén, Spain

<sup>3</sup> Selcuk University, Science Faculty, Department of Biology, Campus, 42250, Konya, Turkey

<sup>4</sup> Necmettin Erbakan University, Ahmet Kelesoglu Education Faculty, Department of Biological Education, 42075, Konya, Turkey

<sup>5</sup> Department of Pharmaceutical Botany, "Iuliu Hatieganu" University of Medicine and Pharmacy, 8, V. Babes Street, Cluj-Napoca, Romania

\*Corresponding author. Tel.: +90 332 223 27 81; Fax: +90 332 2410106 E-mail address: biyologzengin@yahoo.com (Dr. Gokhan ZENGIN)

**Table 1.** Characterization of the methanolic extract of aerial parts from *L. pratensis*

| No. | t <sub>R</sub> (min) | [M-H] <sup>-</sup> m/z | m/z (% base peak)                                                                                                                                                                                   | Assigned identification                       |
|-----|----------------------|------------------------|-----------------------------------------------------------------------------------------------------------------------------------------------------------------------------------------------------|-----------------------------------------------|
| 1   | 1.1                  | 378                    | MS <sup>2</sup> [378]: 341 (100), 215 (11), 179 (9)<br>MS <sup>3</sup> [378→341]: 282 (18), 179 (100), 161 (48), 131 (32), 119 (11), 107 (13)<br>MS <sup>4</sup> [378→341→179]: 143 (84), 113 (100) | Oligosaccharide derivative                    |
| 3   | 1.5                  | 315                    | MS <sup>2</sup> [315]: 153 (100), 109 (13), 108 (7)                                                                                                                                                 | Dihydroxybenzoic acid hexoside                |
| 4   | 2.8                  | 353                    | MS <sup>2</sup> [353]: 191 (100), 173 (30), 179 (21), 135 (4)<br>MS <sup>3</sup> [353→191]: 191 (100), 173 (10), 163 (9)                                                                            | Caffeoylquinic acid                           |
| 6   | 3.1                  | 595                    | MS <sup>2</sup> [595]: 577 (5), 505 (19), 475 (48), 415 (26), 385 (83), 355 (100)<br>MS <sup>3</sup> [595→355]: 327 (20), 261 (25), 249 (30), 235 (100), 209 (85), 167 (17), 143 (19)               | Naringenin-6,8-di-C-hexoside                  |
| 9   | 4                    | 609                    | MS <sup>2</sup> [609]: 447 (100), 285 (33)<br>MS <sup>3</sup> [609→447]: 285 (74), 284 (100), 297 (81), 255 (74), 225 (36)                                                                          | Kaempferol-di-O-hexoside                      |
| 10  | 4.6                  | 785                    | MS <sup>2</sup> [785]: 623 (100)<br>MS <sup>3</sup> [785→623]: 315 (100), 300 (28)<br>MS <sup>4</sup> [785→623→315]: 300 (100), 271 (7), 201 (6), 191 (4)                                           | Isorhamnetin-3-O-rutinoside-7-O-hexoside      |
| 11  | 4.7                  | 931                    | MS <sup>2</sup> [931]: 769 (100)<br>MS <sup>3</sup> [931→769]: 769 (100), 315 (80), 300 (23), 271 (9), 255 (6)<br>MS <sup>4</sup> [931→769→315]: 300 (100), 255 (5), 151 (6)                        | Isorhamnetin-O-hexoside-O-rhamnosylrutinoside |
| 12  | 5.7                  | 367                    | MS <sup>2</sup> [367]: 191 (100), 173 (33)                                                                                                                                                          | 5-Feruloylquinic acid                         |

|    |     |     |                                                                                                                                      |                                           |
|----|-----|-----|--------------------------------------------------------------------------------------------------------------------------------------|-------------------------------------------|
| 14 | 6.4 | 609 | MS <sup>2</sup> [609]: 463 (64), 447 (100), 301 (79)<br>MS <sup>3</sup> [609→447]: 301 (100)                                         | Quercetin-O-hexoside-O-rhamnoside         |
| 15 | 6.5 | 625 | MS <sup>2</sup> [625]: 317 (90), 316 (100)<br>MS <sup>3</sup> [625→316]: 271 (100), 179 (60), 151 (25)                               | Myricetin-O-rutinoside                    |
| 17 | 6.8 | 479 | MS <sup>2</sup> [479]: 317 (100), 316 (85), 271 (9), 179 (10)<br>MS <sup>3</sup> [479→316]: 271 (100), 179 (57), 151 (21)            | Myricetin-O-hexoside                      |
| 18 | 7.0 | 367 | MS <sup>2</sup> [367]: 191 (23), 179 (100), 135 (48)<br>MS <sup>3</sup> [367→179]: 135 (100)                                         | Methyl-caffeoyl-quinic acid               |
| 19 | 7.4 | 739 | MS <sup>2</sup> [739]: 593 (45), 575 (70), 285 (100), 284 (96)<br>MS <sup>3</sup> [739→285]: 255 (100), 229 (13), 151 (35)           | Kaempferol-O-rhamnoside-O-rutinoside      |
| 20 | 7.5 | 623 | MS <sup>2</sup> [623]: 503 (18), 461 (100), 447 (38), 351 (36), 285 (87)<br>MS <sup>3</sup> [623→461]: 286 (18), 285 (100)           | Kaempferol-O-hexoside-O-glucuronide       |
| 22 | 7.7 | 593 | MS <sup>2</sup> [593]: 483 (13), 447 (100), 431 (35), 285 (78)<br>MS <sup>3</sup> [593→447]: 327 (94), 285 (64), 255 (71), 284 (100) | Kaempferol-O-hexoside-O-rhamnoside        |
| 23 | 7.8 | 755 | MS <sup>2</sup> [755]: 609 (8), 301 (100)<br>MS <sup>3</sup> [755→301]: 271 (13), 255 (17), 179 (95), 151 (100)                      | Quercetin-O-rhamnoside-O-rutinoside       |
| 25 | 7.9 | 655 | MS <sup>2</sup> [655]: 609 (9), 447 (100)<br>MS <sup>3</sup> [655→447]: 285 (100), 151 (2)                                           | Kaempferol-di-O-hexoside (formate adduct) |
| 27 | 8.1 | 609 | MS <sup>2</sup> [609]: 302 (20), 301 (100), 300 (15), 271 (6)                                                                        | Rutin                                     |

|    |      |     |                                                                                                                                                                       |                                                                |
|----|------|-----|-----------------------------------------------------------------------------------------------------------------------------------------------------------------------|----------------------------------------------------------------|
|    |      |     | MS <sup>3</sup> [609→301]: 273 (100), 271 (34), 255 (26), 179 (53), 151 (76)<br>MS <sup>4</sup> [609→301→179]:151 (100), 107 (46)                                     |                                                                |
| 30 | 8.4  | 463 | MS <sup>2</sup> [463]: 302 (18), 301 (100)<br>MS <sup>3</sup> [463→301]: 255 (4), 179 (51), 151 (100)                                                                 | Quercetin-O-hexoside                                           |
| 32 | 8.7  | 739 | MS <sup>2</sup> [739]: 593 (1), 286 (18), 285 (100)<br>MS <sup>3</sup> [739→285]: 257 (100), 241 (53), 213 (40), 151 (96)                                             | Kaempferol-O-rhamnoside-O-rutinoside                           |
| 34 | 9    | 479 | MS <sup>2</sup> [479]: 317 (199)<br>MS <sup>3</sup> [479→317]: 179 (100), 151 (82)                                                                                    | Myricetin-O-hexoside                                           |
| 35 | 9.3  | 463 | MS <sup>2</sup> [463]: 302 (11), 301 (100)<br>MS <sup>3</sup> [463→301]: 301 (100), 255 (53), 151 (47)                                                                | Quercetin-O-hexoside                                           |
| 37 | 9.5  | 769 | MS <sup>2</sup> [769]: 623 (4) 315 (100), 300 (8), 271 (10)<br>MS <sup>3</sup> [769→315]: 300 (100), 271 (11)                                                         | Isorhamnetin rhamnosyl-rutinoside                              |
| 38 | 9.5  | 593 | MS <sup>2</sup> [593]: 285 (100)<br>MS <sup>3</sup> [593→285]: 257 (97), 243 (8), 241 (100), 229 (73), 213 (58), 199 (46), 151 (64)                                   | Luteolin-O-rutinoside                                          |
| 39 | 9.8  | 623 | MS <sup>2</sup> [623]: 315 (100), 300 (16), 271 (16)<br>MS <sup>3</sup> [623→315]: 301 (100), 300 (68), 271 (32), 163 (22)<br>MS <sup>4</sup> [623→315→300]:271 (100) | Isorhamnetin-O-rutinoside (or isorhamnetin-O-neohesperidoside) |
| 41 | 10.2 | 447 | MS <sup>2</sup> [447]: 285 (100)<br>MS <sup>3</sup> [447→285]: 255 (100), 243 (12), 241 (36), 175 (53), 151 (8)                                                       | Luteolin-O-hexoside                                            |

|    |      |      |                                                                                                                                                                                  |                                                     |
|----|------|------|----------------------------------------------------------------------------------------------------------------------------------------------------------------------------------|-----------------------------------------------------|
| 44 | 10.9 | 515  | MS <sup>2</sup> [515]: 353 (100), 335 (7), 203 (13), 179 (7), 173 (13)<br>MS <sup>3</sup> [515→353]: 191 (20), 179 (65), 173 (100), 135 (29)                                     | 3-4-dicaffeoylquinic acid                           |
| 45 | 11.4 | 447  | MS <sup>2</sup> [447]: 285 (100)<br>MS <sup>3</sup> [447→285]: 243 (96), 241 (82), 151 (100)                                                                                     | Luteolin-O-hexoside                                 |
| 46 | 13.1 | 753  | MS <sup>2</sup> [753]: 300 (12), 299 (100), 255 (15)<br>MS <sup>3</sup> [753→299]: 284 (100), 240 (45), 165 (53)<br>MS <sup>4</sup> [753→299→284]: 256 (52), 255 (100), 162 (28) | Methylkaempferol-O-(deoxyhexose-hexose-deoxyhexose) |
| 48 | 14.2 | 285  | MS <sup>2</sup> [285]: 243 (24), 241 (100), 151 (29), 107 (43)                                                                                                                   | Luteolin                                            |
| 49 | 14.5 | 517  | MS <sup>2</sup> [517]: 471 (5), 311 (26), 293 (100), 233 (71), 191 (17), 149 (35)<br>MS <sup>3</sup> [517→293]: 233 (51), 149 (100)                                              | Unknown                                             |
| 52 | 15.3 | 431  | MS <sup>2</sup> [431]: 384 (22), 285 (40), 223 (100), 179 (54), 161 (34)                                                                                                         | Unknown                                             |
| 55 | 19.5 | 327  | MS <sup>2</sup> [327]: 291 (36), 229 (100), 211 (74), 209 (22), 171 (60), 165 (14)<br>MS <sup>3</sup> [327→229]: 211 (96), 209 (100), 165 (27), 155 (14), 125 (85)               | Oxo-dihydroxy-octadecenoic acid                     |
| 57 | 21.9 | 971  | MS <sup>2</sup> [971]: 953 (37), 927 (6), 909 (100), 825 (4), 763 (19), 645 (20), 627 (4), 601 (6), 555 (6), 487 (6), 469 (7)<br>MS <sup>3</sup> [971→909]: 763 (100), 601 (21)  | dHex-Hex-HexA-Bayogenin                             |
| 59 | 25.0 | 329  | MS <sup>2</sup> [329]: 311 (19), 293 (20), 229 (100), 211 (78), 171 (30)                                                                                                         | Trihydroxy-octadecenoic acid                        |
| 61 | 26.6 | 1073 | MS <sup>2</sup> [1073]: 1055 (100), 1011 (36), 927 (9), 865 (26), 747 (20), 703 (46), 657 (20), 437 (8)<br>MS <sup>3</sup> [1073→1055]: 657 (100)                                | Saponin                                             |

|    |      |      |                                                                                                                                                                                                                                |                                |
|----|------|------|--------------------------------------------------------------------------------------------------------------------------------------------------------------------------------------------------------------------------------|--------------------------------|
| 67 | 31   | 691  | MS <sup>2</sup> [691]: 673 (20), 415 (70), 397 (100), 293 (12)<br>MS <sup>3</sup> [691→415]: 397 (53), 263 (49), 253 (100), 179 (71), 143 (70)<br>MS <sup>3</sup> [691→397]: 305 (60), 287 (38), 235 (100), 221 (45), 161 (42) | Unknown                        |
| 69 | 32.5 | 1027 | MS <sup>2</sup> [1027]: 983 (100)<br>MS <sup>3</sup> [1027→983]: 965 (100), 913 (40), 863 (20), 775 (31), 567 (15), 479 (56)                                                                                                   | Saponin                        |
| 70 | 32.8 | 939  | MS <sup>2</sup> [939]: 921 (100)<br>MS <sup>3</sup> [939→921]: 877 (100)<br>MS <sup>4</sup> [939→921→877]: 731 (100)                                                                                                           | Saponin                        |
| 71 | 33.6 | 941  | MS <sup>2</sup> [941]: 923 (100), 879 (24), 795 (9), 751 (4), 795 (11), 733 (32), 633 (1), 615 (8), 597 (5), 525 (27), 457 (2)<br>MS <sup>3</sup> 941[→923]: 879 (100), 733 (27), 597 (64), 525 (60)                           | 3-Rha-Gal-GlcA-Soyasapogenol B |
| 72 | 34.7 | 795  | MS <sup>2</sup> [795]: 633 (23), 615 (100), 525 (20), 457 (9)<br>MS <sup>3</sup> [795→615]: 571 (88), 437 (100)                                                                                                                | Unknown                        |
| 75 | 36.2 | 939  | MS <sup>2</sup> [939]: 921 (100), 877 (11), 793 (5), 731 (17), 613 (9), 595 (18), 523 (11)<br>MS <sup>3</sup> [939→921]: 877 (100), 731 (52), 595 (44), 525 (32), 523 (87)                                                     | dHex-Hex-HexA-Soyasapogenol E  |

HexA, uronic acid, such as glucuronic acid or galacturonic acid; Hex, hexose, such as glucose or galactose; dHex, 6-deoxyhexose, such as rhamnose or furanose; GlcA, glucuronic acid; Gal, galactose; Rha, rhamnose. \* Comparison with analytical standard

**Table 2.** Characterization of the methanolic extract of aerial parts from *L. aureus*

| No. | $t_R$ (min) | [M-H] <sup>-</sup> $m/z$ | $m/z$ (% base peak)                                                                                                                                                                                                     | Assigned identification              |
|-----|-------------|--------------------------|-------------------------------------------------------------------------------------------------------------------------------------------------------------------------------------------------------------------------|--------------------------------------|
| 1   | 1.1         | 378                      | MS <sup>2</sup> [378]: 341 (100), 215 (11), 179 (8), 143 (1)<br>MS <sup>3</sup> [378→341]: 277 (100), 179 (100), 161 (57), 143 (33), 119 (81), 113 (62)<br>MS <sup>4</sup> [378→341→179]: 161 (100), 143 (24), 119 (37) | Oligosaccharide derivative           |
| 2   | 1.1         | 191                      | MS <sup>2</sup> [191]: 173 (32), 111 (100)                                                                                                                                                                              | Citric acid                          |
| 5   | 3.0         | 295                      | MS <sup>2</sup> [295]: 163 (100), 149 (4), 119 (16), 113 (5)<br>MS <sup>3</sup> [295→163]: 119 (100)                                                                                                                    | Coutaric acid                        |
| 7   | 3.1         | 431                      | MS <sup>2</sup> [431]: 329 (100), 203 (52), 125 (41), 165 (20), 143 (29)<br>MS <sup>3</sup> [431→329]: 203 (93), 191 (76), 125 (100)                                                                                    | Unknown                              |
| 8   | 3.6         | 325                      | MS <sup>2</sup> [325]: 193 (100)<br>MS <sup>3</sup> [325→193]: 178 (32), 149 (100), 134 (68)                                                                                                                            | Ferulic acid-O-pentoside             |
| 13  | 6.2         | 755                      | MS <sup>2</sup> [755]: 300 (100), 301 (85)<br>MS <sup>3</sup> [755→300]: 271 (100), 255 (50), 179 (22), 151 (20)                                                                                                        | Quercetin derivative                 |
| 16  | 6.7         | 447                      | MS <sup>2</sup> [447]: 429 (16), 357 (66), 327 (100), 285 (5)                                                                                                                                                           | Luteolin-6-C-hexoside                |
| 19  | 7.2         | 739                      | MS <sup>2</sup> [739]: 593 (40), 575 (100), 285 (92), 284 (85), 257 (31)<br>MS <sup>3</sup> [739→575]: 429 (35), 339 (100), 327 (18), 285 (9)<br>MS <sup>3</sup> [739→285]: 257 (21), 255 (100), 229 (8), 151 (22)      | Kaempferol-O-rhamnoside-O-rutinoside |
| 21  | 7.6         | 279                      | MS <sup>2</sup> [279]: 163 (100), 133 (2), 119 (5), 115 (1)<br>MS <sup>3</sup> [279→163]: 119 (100)                                                                                                                     | p-coumaroyl malate                   |

|    |      |     |                                                                                                                                                                                  |                                                                                                                   |
|----|------|-----|----------------------------------------------------------------------------------------------------------------------------------------------------------------------------------|-------------------------------------------------------------------------------------------------------------------|
| 24 | 7.8  | 769 | MS <sup>2</sup> [769]: 623 (15), 315 (100), 300 (32)<br>MS <sup>3</sup> [769→315]: 300 (100), 285 (18), 151 (14)<br>MS <sup>4</sup> [769→315→300]: 271 (100), 243 (37), 151 (51) | Isorhamnetin rhamnosyl-rutinoside                                                                                 |
| 26 | 8.0  | 431 | MS <sup>2</sup> [431]: 341 (3), 311 (100), 283 (7)<br>MS <sup>3</sup> [431→311]: 283 (100), 225 (8)                                                                              | Apigenin-8-C-hexoside                                                                                             |
| 28 | 8.1  | 873 | MS <sup>2</sup> [873]: 593 (60), 739 (20), 279 (100)<br>MS <sup>3</sup> [873→279]: 163 (72), 133 (100), 119 (5), 115 (20)                                                        | p-coumaroyl malate derivative                                                                                     |
| 29 | 8.2  | 593 | MS <sup>2</sup> [593]: 285 (93), 284 (100), 255 (37)<br>MS <sup>3</sup> [593→284]: 257 (31), 255 (100), 107 (21), 241 (18), 151 (54)                                             | Kaempferol-O- rutinoside                                                                                          |
| 31 | 8.5  | 753 | MS <sup>2</sup> [753]: 691 (3), 651 (3), 609 (100)<br>MS <sup>3</sup> [753→609]: 489 (29), 343 (16), 301 (73), 300 (100), 271 (46)                                               | Brutieridin                                                                                                       |
| 33 | 8.8  | 593 | MS <sup>2</sup> [593]: 285 (100), 284 (45), 255 (16)<br>MS <sup>3</sup> [593→285]: 257 (56), 255 (100), 241 (25), 151 (43)                                                       | Kaempferol-O-rutinoside                                                                                           |
| 36 | 9.3  | 737 | MS <sup>2</sup> [737]: 675 (12), 635 (14), 593 (100)<br>MS <sup>3</sup> [737→593]: 285 (69), 284 (100), 255 (29)<br>MS <sup>4</sup> [737→593→284]: 255 (100), 151 (12)           | Kaempferol O- $\alpha$ -l-rhamnopyranosyl-(1 → 2)-[(O-(3-hydroxy-3-methylglutaryl)- $\beta$ -d-galactopyranoside] |
| 40 | 10.1 | 737 | MS <sup>2</sup> [737]: 675 (10), 635 (10), 593 (100)<br>MS <sup>3</sup> [737→593]: 429 (29), 327 (28), 285 (100), 179 (21)<br>MS <sup>4</sup> [737→593→285]: 255 (100)           | Kaempferol O- $\alpha$ -l-rhamnopyranosyl-(1 → 2)-[(O-(3-hydroxy-3-methylglutaryl)- $\beta$ -d-galactopyranoside] |
| 43 | 10.5 | 591 | MS <sup>2</sup> [591]: 447 (100)                                                                                                                                                 | Kaempferol-O-hexoside derivative                                                                                  |



|    |      |     |                                                                                                                                                                                 |                                 |
|----|------|-----|---------------------------------------------------------------------------------------------------------------------------------------------------------------------------------|---------------------------------|
|    |      |     | MS <sup>3</sup> [591→447]: 285 (100), 284 (56), 255 (11), 151 (3)<br>MS <sup>4</sup> [591→447→285]: 257 (45), 255 (100), 213 (21)                                               |                                 |
| 47 | 13.7 | 987 | MS <sup>2</sup> [987]: 969 (96), 925 (20), 825 (100), 807 (24), 763 (45), 645 (52), 627 (20), 555 (45), 469 (54)<br>MS <sup>3</sup> [987→825]: 763 (30), 645 (100), 583 (52)    | Saponin                         |
| 50 | 14.8 | 825 | MS <sup>2</sup> [825]: 763 (14), 645 (100), 601 (7), 487 (8)<br>MS <sup>3</sup> [825→645]: 487 (32), 443 (100)                                                                  | Saponin                         |
| 51 | 15.2 | 795 | MS <sup>2</sup> [795]: 645 (100)<br>MS <sup>3</sup> [795→645]: 557 (45), 487 (82), 443 (100)                                                                                    | Unknown                         |
| 53 | 17.0 | 809 | MS <sup>2</sup> [809]: 747 (5), 629 (100), 539 (7), 471 (2)<br>MS <sup>3</sup> [809→629]: 585 (100)                                                                             | Saponin                         |
| 54 | 18.5 | 795 | MS <sup>2</sup> [795]: 645 (100), 487 (6)<br>MS <sup>3</sup> [795→645]: 487 (100)                                                                                               | Unknown                         |
| 55 | 19.5 | 327 | MS <sup>2</sup> [327]: 291 (67), 229 (84), 211 (61), 209 (39), 171 (100), 165 (15)<br>MS <sup>3</sup> [327→229]: 211 (100), 209 (17), 171 (27), 155 (31), 125 (27)              | Oxo-dihydroxy-octadecenoic acid |
| 56 | 21.0 | 941 | MS <sup>2</sup> [941]: 923 (5), 879 (100), 733 (1), 645 (12)<br>MS <sup>3</sup> [941→879]: 733 (100), 715 (5)                                                                   | Saponin                         |
| 57 | 21.9 | 971 | MS <sup>2</sup> [971]: 953 (51), 927 (2), 909 (100), 825 (4), 763 (18), 645 (32), 627 (2), 601 (7), 555 (5), 487 (4), 469 (7)<br>MS <sup>3</sup> [971→909]: 763 (100), 601 (34) | dHex-Hex-HexA-Bayogenin         |
| 58 | 24.1 | 825 | MS <sup>2</sup> [825]: 781 (8), 763 (30), 645 (100), 487 (5), 469 (7)                                                                                                           | Saponin                         |
| 59 | 24.8 | 329 | MS <sup>2</sup> [329]: 311 (8), 309 (35), 229 (100), 211 (31), 209 (21)                                                                                                         | Trihydroxy-octadecenoic acid    |

|    |      |     |                                                                                                                                                                                                                                         |                                |
|----|------|-----|-----------------------------------------------------------------------------------------------------------------------------------------------------------------------------------------------------------------------------------------|--------------------------------|
| 60 | 24.9 | 795 | MS <sup>2</sup> [795]: 733 (21), 645 (100), 487 (7)<br>MS <sup>3</sup> [795→645]: 585 (80), 487 (100)<br>MS <sup>4</sup> [795→645→487]: 441 (75), 439 (100)                                                                             | Unknown                        |
| 62 | 26.8 | 971 | MS <sup>2</sup> [971]: 851 (2), 809 (100), 791 (1), 747 (2), 629 (8), 585 (2)<br>MS <sup>3</sup> [971→809]: 747 (19), 629 (100), 603 (9), 585 (4), 553 (3), 471 (20), 469 (2)                                                           | Hex-Hex-HexA-Hederagenin       |
| 63 | 27.3 | 941 | MS <sup>2</sup> [941]: 779 (100), 629 (38), 585 (5)<br>MS <sup>3</sup> [941→779]: 629 (100), 585 (9), 471 (13)<br>MS <sup>4</sup> [941→779→629]: 585 (20), 439 (100)                                                                    | Unknown                        |
| 64 | 29.6 | 779 | MS <sup>2</sup> [779]: 629 (100), 439 (20)<br>MS <sup>3</sup> [779→629]: 585 (67), 567 (55), 511 (100), 471 (78)                                                                                                                        | Unknown                        |
| 65 | 30.1 | 837 | MS <sup>2</sup> [837]: 775 (8), 687 (100), 643 (6), 611 (5), 529 (10)<br>MS <sup>3</sup> [837→687]: 643 (100), 625 (80), 481 (95), 463 (45)                                                                                             | Unknown                        |
| 66 | 30.5 | 793 | MS <sup>2</sup> [793]: 643 (100), 599 (14), 485 (4)<br>MS <sup>3</sup> [793→643]: 599 (100), 597 (25), 583 (36), 527 (16), 485 (34)                                                                                                     | Unknown                        |
| 68 | 32.1 | 823 | MS <sup>2</sup> [823]: 673 (100), 515 (22), 451 (10)<br>MS <sup>3</sup> [823→673]: 629 (96), 611 (100), 537 (83), 515 (70), 495 (58)                                                                                                    | Unknown                        |
| 71 | 33.6 | 941 | MS <sup>2</sup> [941]: 923 (100), 879 (34), 795 (7), 751 (4), 733 (27), 633 (1), 615 (14), 597 (8), 525 (18), 457 (1)<br>MS <sup>3</sup> [941→923]: 879 (70), 733 (62), 597 (100), 525 (48)<br>MS <sup>4</sup> [941→923→879]: 733 (100) | 3-Rha-Gal-GlcA-Soyasapogenol B |
| 72 | 34.7 | 795 | MS <sup>2</sup> [795]: 615 (100), 457 (18)                                                                                                                                                                                              | Unknown                        |

|    |      |     |                                                                                                                                                                        |                                                      |
|----|------|-----|------------------------------------------------------------------------------------------------------------------------------------------------------------------------|------------------------------------------------------|
|    |      |     | MS <sup>3</sup> [795→615]: 571 (32), 553 (45), 457 (100), 423 (28)                                                                                                     |                                                      |
| 73 | 35.2 | 765 | MS <sup>2</sup> [765]: 615 (100), 457 (30)<br>MS <sup>3</sup> [765→615]: 571 (63), 567 (38), 553 (100), 497 (50), 375 (67)<br>MS <sup>4</sup> [765→615→553]: 497 (100) | Unknown                                              |
| 74 | 35.9 | 809 | MS <sup>2</sup> [809]: 747 (13), 647 (6), 629 (100), 603 (8), 585 (15), 567 (1), 553 (11), 539 (5), 471 (19), 469 (1), 453 (10), 451 (4), 423 (4)                      | Hex-HexA-Hederagenin                                 |
| 75 | 36.3 | 939 | MS <sup>2</sup> [939]: 921 (100), 877 (32), 793 (10), 749 (4), 731 (22), 613 (16), 595 (6), 523 (15), 455 (1)<br>MS <sup>3</sup> [939→921]: 877 (100), 523 (59)        | dHex-Hex-HexA-Soyasapogenol E                        |
| 76 | 37.4 | 909 | MS <sup>2</sup> [909]: 891 (100), 847 (36), 701 (12), 613 (34), 595 (6), 523 (7)<br>MS <sup>3</sup> [909→891]: 847 (100), 595 (78), 523 (61)                           | Soyasapogenol E-3-O-rhamnosyl arabinosyl glucuronide |
| 77 | 38.1 | 763 | MS <sup>2</sup> [763]: 613 (100), 595 (18)<br>MS <sup>3</sup> [763→613]: 569 (100), 553 (69), 455 (74), 407 (73)<br>MS <sup>4</sup> [763→613→569]: 551 (100)           | Unknown                                              |

HexA, uronic acid, such as glucuronic acid or galacturonic acid; Hex, hexose, such as glucose or galactose; dHex, 6-deoxyhexose, such as rhamnose or furanose; GlcA, glucuronic acid; Gal, galactose; Rha, rhamnose.

**Table 3**Extraction yields, total phenolic and flavonoid contents of *Lathyrus* species (mean±SD)\*

| Assay                                   | <i>L. aureus</i> |             |             | <i>L. pratensis</i> |             |             |
|-----------------------------------------|------------------|-------------|-------------|---------------------|-------------|-------------|
|                                         | Ethyl acetate    | Methanol    | Water       | Ethyl acetate       | Methanol    | Water       |
| Extraction yields (%)                   | 0.31             | 14.92       | 15.72       | 0.86                | 16.49       | 22.12       |
| Total phenolics (mg GAEs/g extract) **  | 21.34±0.18b      | 22.74±0.08a | 19.42±0.51c | 13.33±0.15c         | 40.54±0.24b | 66.69±0.21a |
| Total flavonoids (mg REs/g extract) *** | 0.89±0.15c       | 5.32±0.13b  | 15.77±0.28a | 0.08±0.07c          | 26.16±0.16b | 38.90±0.77a |

\* Data marked with different letters within the same row indicate statistically significant differences for each sample ( $p < 0.05$ )

\*\* GAEs, gallic acid equivalents.

\*\*\* REs, rutin equivalents.

**Table 4**Radical scavenging activities of *Lathyrus* species (mean±SD)\*

| Samples       | <i>L. aureus</i>          |                                  | <i>L. pratensis</i>       |                                  |
|---------------|---------------------------|----------------------------------|---------------------------|----------------------------------|
|               | DPPH (mg TEs/g extract)** | ABTS cation (mg TEs/g extract)** | DPPH (mg TEs/g extract)** | ABTS cation (mg TEs/g extract)** |
| Ethyl acetate | 6.92±0.62ab               | 3.39±0.01c                       | 12.39±0.67c               | 5.14±0.96c                       |
| Methanol      | 4.09±1.38b                | 34.37±0.75b                      | 126.68±0.58b              | 67.85±0.25b                      |
| Water         | 9.77±1.77a                | 67.38±0.99a                      | 259.00±1.28a              | 166.09±0.28a                     |

\* Data marked with different letters within the same column indicate statistically significant differences for each sample ( $p < 0.05$ )

\*\* TEs, trolox equivalents.

**Table 5**Reducing power of *Lathyrus* species (mean±SD)\*

| Samples       | <i>L. aureus</i>          |                             | <i>L. pratensis</i>       |                             |
|---------------|---------------------------|-----------------------------|---------------------------|-----------------------------|
|               | FRAP (mg TEs/g extract)** | CUPRAC (mg TEs/g extract)** | FRAP (mg TEs/g extract)** | CUPRAC (mg TEs/g extract)** |
| Ethyl acetate | 14.89±0.46c               | 37.47±1.76c                 | 13.32±0.06c               | 35.33±0.38c                 |
| Methanol      | 31.98±0.02b               | 71.22±0.08a                 | 82.02±2.37b               | 117.37±1.90b                |
| Water         | 39.22±0.91a               | 54.17±0.57b                 | 154.69±0.21a              | 221.61±0.44a                |

\* Data marked with different letters within the same column indicate statistically significant differences for each sample ( $p < 0.05$ )

\*\* TEs, trolox equivalents.
